# Supplementary material for: Giardia duodenalis Styles, 1902 Prevalence in Cattle (Bos taurus Linnaeus, 1758) in Europe: A Systematic Review
Source: Microorganisms. 2023 Jan 24;11(2):309. doi: 10.3390/microorganisms11020309 (PMC9965812; doi:10.3390/microorganisms11020309)
Supplement: Supplementary file 1 [file microorganisms-11-00309-s001.zip › S2_Data extracted from included studies_V2.xlsx]

## Sheet: Supplementary material
															Molecular diagnostics							RESULTS														Risk factors, p-value
Title	year	author	Study country	Region	Start of the study	End of the study	Study months	Farms visited	Samples collected	Age range	Sample collection	Sample preperation	Fecal diagnostic tools used	Kit USED	DNA isolation	PCR used	β-giardin gene used	TPI gene used	GHD gene used	Other gene	Software used for sequence inspection	Positive samples	Animal Prevalence	Min Cysts per gram	Max cysts per gram	Herd/Farm prevalence	Intra herd prevalence	Ass. A found No/Yes	Ass. A prevalence	Ass. B found No/yes	Ass B. prevalence	Ass. E found No/Yes	Ass. E prevalence	Mixed ass. Found No/Yes	Mixed ass. Prevalence	Risk factors	Age sa a risk factor Yes/No	Age- number	Age p value	Diarreah	% of samples being diarretic	Desinfection Yes/No	Desinfecting - as a protective factor	Seasonal prevalence	Which season had more ?
A multicentre prevalence study in Europe on Giardia duodenalis in calves, with molecular identification and risk factor analysis	2012	Geurden	Italy	Veneto, Friuli-Venezia Giulia	2010	2010	January-June	44	503	2-16 weeks	per rectum	N/A	ELISA	GIARDIA II, Techlab, Blacksburg	QIAamp DNA Stool mini kit	PCR	Yes		No	N/A	3104 genetic analyzer	N/A	32.2	N/A	N/A	88.6	32.2	yes	28	no	N/A	yes	72	no	N/a	Not checked	N/a	N/a	N/a	N/a	N/a	N/a	N/a	N/A	N/A
A multicentre prevalence study in Europe on Giardia duodenalis in calves, with molecular identification and risk factor analysis	2012	Geurden	Italy	Veneto, Friuli-Venezia Giulia	2010	2010	January-June	44	503	2-16 weeks	per rectum	N/A	ELISA	GIARDIA II, Techlab, Blacksburg	QIAamp DNA Stool mini kit	PCR		yes	No	N/A	3105 genetic analyzer	N/A	32.2	N/A	N/A	88.6	32.2	yes	29	no	N/A	yes	50	yes	21	Not checked	N/a	N/a	N/a	N/a	N/a	N/a	N/a	N/A	N/A
A multicentre prevalence study in Europe on Giardia duodenalis in calves, with molecular identification and risk factor analysis	2012	Geurden	United Kingdonm	West part	2010	2010	January-June	31	556	2-16 weeks	per rectum	N/A	ELISA	GIARDIA II, Techlab, Blacksburg	QIAamp DNA Stool mini kit	PCR	Yes		No	N/A	3106 genetic analyzer	N/A	54.9	N/A	N/A	100	54.8	yes	29	no	N/A	yes	71	No	N/a	Not checked	N/a	N/a	N/a	N/a	N/a	N/a	N/a	N/A	N/A
A multicentre prevalence study in Europe on Giardia duodenalis in calves, with molecular identification and risk factor analysis	2012	Geurden	Germany	Around Berlin	2010	2010	January-June	31	536	2-16 weeks	per rectum	N/A	ELISA	GIARDIA II, Techlab, Blacksburg	QIAamp DNA Stool mini kit	PCR		yes	No	N/A	3103 genetic analyzer	N/A	51.2	N/A	N/A	100	51.2	yes	33	no	N/A	yes	38	yes	29	Not checked	N/a	N/a	N/a	N/a	N/a	N/a	N/a	N/A	N/A
A multicentre prevalence study in Europe on Giardia duodenalis in calves, with molecular identification and risk factor analysis	2012	Geurden	United Kingdonm	West part	2010	2010	January-June	31	556	2-16 weeks	per rectum	N/A	ELISA	GIARDIA II, Techlab, Blacksburg	QIAamp DNA Stool mini kit	PCR		yes	No	N/A	3107 genetic analyzer	N/A	54.9	N/A	N/A	100	54.8	yes	33	no	N/A	yes	23	yes	44	Not checked	N/a	N/a	N/a	N/a	N/a	N/a	N/a	N/A	N/A
A multicentre prevalence study in Europe on Giardia duodenalis in calves, with molecular identification and risk factor analysis	2012	Geurden	Germany	Around Berlin	2010	2010	January-June	31	536	2-16 weeks	per rectum	N/A	ELISA	GIARDIA II, Techlab, Blacksburg	QIAamp DNA Stool mini kit	PCR	Yes		No	N/A	3102 genetic analyzer	N/A	51.2	N/A	N/A	100	51.2	yes	41	no	N/A	yes	59	no	N/a	Not checked	N/a	N/a	N/a	N/a	N/a	N/a	N/a	N/A	N/A
A multicentre prevalence study in Europe on Giardia duodenalis in calves, with molecular identification and risk factor analysis	2012	Geurden	France	Seine Maritime, La Manche, La Finistere	2010	2010	January-June	101	477	2-16 weeks	per rectum	N/A	ELISA	GIARDIA II, Techlab, Blacksburg	QIAamp DNA Stool mini kit	PCR		yes	No	N/A	3101 genetic analyzer	N/A	39.8	N/A	N/A	82.4	39.8	yes	40	no	N/A	yes	20	yes	40	yes, age, desinfection	N/a	N/a	N/a	N/a	N/a	N/a	N/a	N/A	N/A
A multicentre prevalence study in Europe on Giardia duodenalis in calves, with molecular identification and risk factor analysis	2012	Geurden	France, Germany, Italy, UK - TOTAL		2010	2010	january-june	101		2-16 weeks	per rectum	N/A	ELISA	GIARDIA II, Techlab, Blacksburg	QIAamp DNA Stool mini kit	PCR	yes		No	N/A	3099 genetic analyzer		45.5	N/a	N/A	89.9	N/a	yes	42	No	No	Yes	58	no	No	yes, age, desinfection	Yes	under 8 weeks	<0.001			yes	yes	N/A	N/A
Cryptosporidium and Giardia in different age groups of Danish cattle and pigs-Occurrence and management associated risk factors	2006	Maddox-Hyttel	Denmark	N/A	2003	2005	august-July	50	255	Lactating cows	rectum	Purification	IFM	Crypto/Giardia-CEL IF test, CelLabs, Australia	N/A	N/A	N/A	N/A	N/A	N/A	N/A	N/A	40	N/A	N/A	60	20	N/A	N/A	N/A	N/A	N/A	N/A	N/A	N/A	yes, age, diarrhea					N/a	N/a	N/a	N/A	N/A
Cryptosporidium and Giardia in different age groups of Danish cattle and pigs-Occurrence and management associated risk factors	2006	Maddox-Hyttel	Denmark	N/A	2003	2005	august-July	50	377	<1 month	rectum	Purification	IFM	Crypto/Giardia-CEL IF test, CelLabs, Australia	N/A	N/A	N/A	N/A	N/A	N/A	N/A	N/A	24	N/A	N/A	82	36	N/A	N/A	N/A	N/A	N/A	N/A	N/A	N/A	yes, age, diarrhea	Yes			no	N/a	N/a	N/a	N/A	N/A
Cryptosporidium and Giardia in different age groups of Danish cattle and pigs-Occurrence and management associated risk factors	2006	Maddox-Hyttel	Denmark	N/A	2003	2005	august-July	50	518	1-12 months	rectum	Purification	IFM	Crypto/Giardia-CEL IF test, CelLabs, Australia	N/A	N/A	N/A	N/A	N/A	N/A	N/A	N/A	43	N/A	N/A	100	40	N/A	N/A	N/A	N/A	N/A	N/A	N/A	N/A	yes, age, diarrhea					N/a	N/a	N/a	N/A	N/A
Cryptosporidium and Giardia in surface water and drinking water: Animal sources and towards the use of a machine-learning approach as a tool for predicting contamination	2020	ligda	Greece	Northen Greece	2017	2017	January-February	15	N/A	<6 months	rectum	N/A	IFM	MERIFLUOR cryptospordiium/giardia kit, Meridian diagnostics, USA	QIAamp DNA Stool mini kit		Yes	Yes	Yes	N/a	Seqman 8.1	N/a	41.3	100	94000	N/A	N/A	Yes	57.6	no	N/A	yes	21.2	yes	6.1	Not checked	N/A	N/A	N/A	N/A	N/A	N/A	N/A	N/A	N/A
Cryptosporidium spp. and Giardia duodenalis in two areas of Galicia (NW Spain)	2011	Castro-Hermida	Spain	Galicia - costal	2008	2010	N/A	N/A	12	neonatal	rectum	N/A	IFM	Aqua-Glo G/C direct FL, Waterborne, USA	QIAamp DNA Stool mini kit	Semi-nested PCR	Yes	N/A	N/A	N/A	N/A	N/A	33.3	176	916	N/A	N/A	Yes	N/A	No	N/A	No	N/A	N/A	N/A	yes, age	yes	Neonatal	N/A	N/a	N/a	N/a	N/a	N/A	N/A
Cryptosporidium spp. and Giardia duodenalis in two areas of Galicia (NW Spain)	2011	Castro-Hermida	Spain	Galicia - inland	2008	2010	N/A	N/A	37	neonatal	rectum	N/A	IFM	Aqua-Glo G/C direct FL, Waterborne, USA	QIAamp DNA Stool mini kit	Semi-nested PCR	Yes	N/A	N/A	N/A	N/A	N/A	37.8	95	5910	N/A	N/A	Yes	N/A	no	N/A	yes	N/A	N/A	N/A	yes, age	yes	Neonatal	N/A	N/a	N/a	N/a	N/a	N/A	N/A
Cryptosporidium spp. and Giardia duodenalis in two areas of Galicia (NW Spain)	2011	Castro-Hermida	Spain	Galicia - costal	2008	2010	N/A	N/A	85	heifers	rectum	N/A	IFM	Aqua-Glo G/C direct FL, Waterborne, USA	QIAamp DNA Stool mini kit	Semi-nested PCR	Yes	N/A	N/A	N/A	N/A	N/A	30.5	15	385	N/A	N/A	Yes	N/A	No	N/A	yes	N/A	N/A	N/A	yes, age			N/A	N/a	N/a	N/a	N/a	N/A	N/A
Cryptosporidium spp. and Giardia duodenalis in two areas of Galicia (NW Spain)	2011	Castro-Hermida	Spain	Galicia - inland	2008	2010	N/A	N/A	172	heifers	rectum	N/A	IFM	Aqua-Glo G/C direct FL, Waterborne, USA	QIAamp DNA Stool mini kit	Semi-nested PCR	Yes	N/A	N/A	N/A	N/A	N/A	32.5	19	15412	N/A	N/A	Yes	N/A	No	N/A	yes	N/A	N/A	N/A	yes, age			N/A	N/a	N/a	N/a	N/a	N/A	N/A
Cryptosporidium spp. and Giardia duodenalis in two areas of Galicia (NW Spain)	2011	Castro-Hermida	Spain	Galicia - inland	2008	2010	N/A	N/A	253	cows	rectum	N/A	IFM	Aqua-Glo G/C direct FL, Waterborne, USA	QIAamp DNA Stool mini kit	Semi-nested PCR	Yes	N/A	N/A	N/A	N/A	N/A	28.8	10	1042	N/A	N/A	Yes	N/A	No	N/A	yes	N/A	N/A	N/A	yes, age			N/A	N/a	N/a	N/a	N/a	N/A	N/A
Cryptosporidium spp. and Giardia duodenalis in two areas of Galicia (NW Spain)	2011	Castro-Hermida	Spain	Galicia - costal	2008	2010	N/A	N/A	90	cows	rectum	N/A	IFM	Aqua-Glo G/C direct FL, Waterborne, USA	QIAamp DNA Stool mini kit	Semi-nested PCR	Yes	N/A	N/A	N/A	N/A	N/A	21.1	10	128	N/A	N/A	no	N/A	No	N/A	yes	N/A	N/A	N/A	yes, age			N/A	N/a	N/a	N/a	N/a	N/A	N/A
Detection of Cryptosporidium Spp. And Giardia Duodenalis in Surface Water: A Health Risk for Humans and Animals	2009	Castro-Hermida	Spain	Galicia	2007	2007	Summer	18	30	neonatal	rectum	N/A	IFM	Aqua-Glo G/C direct FL, Waterborne, USA	N/A	N/A	N/A	N/A	N/A	N/A	N/A	N/a	23.3	5	100	N/A	N/A	N/a	N/a	N/a	N/a	N/a	N/a	N/a	N/a	yes, seasonality	N/a	N/a	N/a	N/a	N/a	N/a	N/a	N/A	N/A
Detection of Cryptosporidium Spp. And Giardia Duodenalis in Surface Water: A Health Risk for Humans and Animals	2009	Castro-Hermida	Spain	Galicia	2007	2007	Winter	18	32	neonatal	rectum	N/A	IFM	Aqua-Glo G/C direct FL, Waterborne, USA	N/A	N/A	N/A	N/A	N/A	N/A	N/A	N/a	9.4	10	40	N/A	N/A	N/a	N/a	N/a	N/a	N/a	N/a	N/a	N/a	yes, seasonality	N/a	N/a	N/a	N/a	N/a	N/a	N/a	N/A	N/A
Detection of Cryptosporidium Spp. And Giardia Duodenalis in Surface Water: A Health Risk for Humans and Animals	2009	Castro-Hermida	Spain	Galicia	2007	2007	Autumn	18	35	neonatal	rectum	N/A	IFM	Aqua-Glo G/C direct FL, Waterborne, USA	N/A	N/A	N/A	N/A	N/A	N/A	N/A	N/a	28.5	10	250	N/A	N/A	N/a	N/a	N/a	N/a	N/a	N/a	N/a	N/a	yes, seasonality	N/a	N/a	N/a	N/a	N/a	N/a	N/a	N/A	N/A
Detection of Cryptosporidium Spp. And Giardia Duodenalis in Surface Water: A Health Risk for Humans and Animals	2009	Castro-Hermida	Spain	Galicia	2007	2007	Spring	18	42	neonatal	rectum	N/A	IFM	Aqua-Glo G/C direct FL, Waterborne, USA	N/A	N/A	N/A	N/A	N/A	N/A	N/A	N/a	21.4	14	7895	N/A	N/A	N/a	N/a	N/a	N/a	N/a	N/a	N/a	N/a	yes, seasonality	N/a	N/a	N/a	N/a	N/a	N/a	N/a	N/A	N/A
Detection of Cryptosporidium Spp. And Giardia Duodenalis in Surface Water: A Health Risk for Humans and Animals	2009	Castro-Hermida	Spain	Galicia	2007	2007	Winter	18	107	heifers	rectum	N/A	IFM	Aqua-Glo G/C direct FL, Waterborne, USA	N/A	N/A	N/A	N/A	N/A	N/A	N/A	N/a	5.6	6	9	N/A	N/A	N/a	N/a	N/a	N/a	N/a	N/a	N/a	N/a	yes, seasonality	N/a	N/a	N/a	N/a	N/a	N/a	N/a	N/A	N/A
Detection of Cryptosporidium Spp. And Giardia Duodenalis in Surface Water: A Health Risk for Humans and Animals	2009	Castro-Hermida	Spain	Galicia	2007	2007	Spring	18	124	heifers	rectum	N/A	IFM	Aqua-Glo G/C direct FL, Waterborne, USA	N/A	N/A	N/A	N/A	N/A	N/A	N/A	N/a	20.2	5	95	N/A	N/A	N/a	N/a	N/a	N/a	N/a	N/a	N/a	N/a	yes, seasonality	N/a	N/a	N/a	N/a	N/a	N/a	N/a	N/A	N/A
Detection of Cryptosporidium Spp. And Giardia Duodenalis in Surface Water: A Health Risk for Humans and Animals	2009	Castro-Hermida	Spain	Galicia	2007	2007	Summer	18	135	heifers	rectum	N/A	IFM	Aqua-Glo G/C direct FL, Waterborne, USA	N/A	N/A	N/A	N/A	N/A	N/A	N/A	N/a	5.9	5	58	N/A	N/A	N/a	N/a	N/a	N/a	N/a	N/a	N/a	N/a	yes, seasonality	N/a	N/a	N/a	N/a	N/a	N/a	N/a	N/A	N/A
Detection of Cryptosporidium Spp. And Giardia Duodenalis in Surface Water: A Health Risk for Humans and Animals	2009	Castro-Hermida	Spain	Galicia	2007	2007	Autumn	18	144	heifers	rectum	N/A	IFM	Aqua-Glo G/C direct FL, Waterborne, USA	N/A	N/A	N/A	N/A	N/A	N/A	N/A	N/a	5.3	6	21	N/A	N/A	N/a	N/a	N/a	N/a	N/a	N/a	N/a	N/a	yes, seasonality	N/a	N/a	N/a	N/a	N/a	N/a	N/a	N/A	N/A
Detection of Cryptosporidium Spp. And Giardia Duodenalis in Surface Water: A Health Risk for Humans and Animals	2009	Castro-Hermida	Spain	Galicia	2007	2007	Winter	18	160	cows	rectum	N/A	IFM	Aqua-Glo G/C direct FL, Waterborne, USA	N/A	N/A	N/A	N/A	N/A	N/A	N/A	N/a	5.6	5	13	N/A	N/A	N/a	N/a	N/a	N/a	N/a	N/a	N/a	N/a	yes, seasonality	N/a	N/a	N/a	N/a	N/a	N/a	N/a	N/A	N/A
Detection of Cryptosporidium Spp. And Giardia Duodenalis in Surface Water: A Health Risk for Humans and Animals	2009	Castro-Hermida	Spain	Galicia	2007	2007	Autumn	18	172	cows	rectum	N/A	IFM	Aqua-Glo G/C direct FL, Waterborne, USA	N/A	N/A	N/A	N/A	N/A	N/A	N/A	N/a	5.2	5	21	N/A	N/A	N/a	N/a	N/a	N/a	N/a	N/a	N/a	N/a	yes, seasonality	N/a	N/a	N/a	N/a	N/a	N/a	N/a	N/A	N/A
Detection of Cryptosporidium Spp. And Giardia Duodenalis in Surface Water: A Health Risk for Humans and Animals	2009	Castro-Hermida	Spain	Galicia	2007	2007	Summer	18	181	cows	rectum	N/A	IFM	Aqua-Glo G/C direct FL, Waterborne, USA	N/A	N/A	N/A	N/A	N/A	N/A	N/A	N/a	4.9	6	59	N/A	N/A	N/a	N/a	N/a	N/a	N/a	N/a	N/a	N/a	yes, seasonality	N/a	N/a	N/a	N/a	N/a	N/a	N/a	N/A	N/A
Detection of Cryptosporidium Spp. And Giardia Duodenalis in Surface Water: A Health Risk for Humans and Animals	2009	Castro-Hermida	Spain	Galicia	2007	2007	Spring	18	184	cows	rectum	N/A	IFM	Aqua-Glo G/C direct FL, Waterborne, USA	N/A	N/A	N/A	N/A	N/A	N/A	N/A	N/a	11.9	5	82	N/A	N/A	N/a	N/a	N/a	N/a	N/a	N/a	N/a	N/a	yes, seasonality	N/a	N/a	N/a	N/a	N/a	N/a	N/a	N/A	N/A
Detection of Cryptosporidium Spp. And Giardia Duodenalis in Surface Water: A Health Risk for Humans and Animals	2009	Castro-Hermida	Spain	Galicia	2007	2007	All year	18	1316	Total	rectum	N/A	IFM	Aqua-Glo G/C direct FL, Waterborne, USA	N/A	N/A	N/A	N/A	N/A	N/A	N/A	123	9.3	N/A	N/A	100	N/a	N/a	N/a	N/a	N/a	N/a	N/a	N/a	N/a	yes, seasonality	N/a	N/a	N/a	N/a	N/a	N/a	N/a	Yes	Spring
Detection of Cryptosporidium Spp. And Giardia Duodenalis in Surface Water: A Health Risk for Humans and Animals	2009	Castro-Hermida	Spain	Galicia	2007	2007	All year	18	N/A	cows	rectum	N/A	IFM	Aqua-Glo G/C direct FL, Waterborne, USA	N/A	N/A	N/A	N/A	N/A	N/A	N/A	49	7	5	82	N/A	N/A	N/a	N/a	N/a	N/a	N/a	N/a	N/a	N/a	yes, seasonality	N/a	N/a	N/a	N/a	N/a	N/a	N/a	N/A	N/A
Detection of Cryptosporidium Spp. And Giardia Duodenalis in Surface Water: A Health Risk for Humans and Animals	2009	Castro-Hermida	Spain	Galicia	2007	2007	All year	18	N/A	heifers	rectum	N/A	IFM	Aqua-Glo G/C direct FL, Waterborne, USA	N/A	N/A	N/A	N/A	N/A	N/A	N/A	45	9.4	5	95	N/A	N/A	N/a	N/a	N/a	N/a	N/a	N/a	N/a	N/a	yes, seasonality	N/a	N/a	N/a	N/a	N/a	N/a	N/a	N/A	N/A
Detection of Cryptosporidium Spp. And Giardia Duodenalis in Surface Water: A Health Risk for Humans and Animals	2009	Castro-Hermida	Spain	Galicia	2007	2007	All year	18	N/A	neonatal	rectum	N/A	IFM	Aqua-Glo G/C direct FL, Waterborne, USA	N/A	N/A	N/A	N/A	N/A	N/A	N/A	29	20.9	5	7894	N/A	N/A	N/a	N/a	N/a	N/a	N/a	N/a	N/a	N/a	yes, seasonality	N/a	N/a	N/a	N/a	N/a	N/a	N/a	N/A	N/A
Detection of potentially human infectious assemblages of Giardia duodenalis in fecal samples from beef and dairy cattle in Scotland	2019	Bartley	Scotland	N/A		N/A	N/A	19	27	1 week	rectum	N/A	N/A	N/A	Modified Macherey-Nagel tissue kit	Nested-PCR	Yes	YEs	Yes	N/A	Seqman pro	4	14.8	N/A	N/A	N/A	N/A	yes	N/A	no	N/A	yes	N/A	N/A	N/A	Not checked	N/A	N/A	N/A	N/A	N/A	N/A	N/A	N/A	N/A
Detection of potentially human infectious assemblages of Giardia duodenalis in fecal samples from beef and dairy cattle in Scotland	2019	Bartley	Scotland	N/A		N/A	N/A	19	76	2 weeks	rectum	N/A	N/A	N/A	Modified Macherey-Nagel tissue kit	Nested-PCR	Yes	YEs	Yes	N/A	Seqman pro	31	40.8	N/A	N/A	N/A	N/A	yes	N/A	yes	N/A	yes	N/A	N/A	N/A	Not checked	N/A	N/A	N/A	N/A	N/A	N/A	N/A	N/A	N/A
Detection of potentially human infectious assemblages of Giardia duodenalis in fecal samples from beef and dairy cattle in Scotland	2019	Bartley	Scotland	N/A		N/A	N/A	19	388	Total	rectum	N/A	N/A	N/A	Modified Macherey-Nagel tissue kit	Nested-PCR	Yes	YEs	Yes	N/A	Seqman pro	126	32.5	N/A	N/A	63.15	N/A	yes	N/A	yes	N/A	yes	N/A	N/A	N/A	Not checked	N/A	N/A	N/A	N/A	N/A	N/A	N/A	N/A	N/A
Detection of potentially human infectious assemblages of Giardia duodenalis in fecal samples from beef and dairy cattle in Scotland	2019	Bartley	Scotland	N/A		N/A	N/A	19	25	5 weeks	rectum	N/A	N/A	N/A	Modified Macherey-Nagel tissue kit	Nested-PCR	Yes	YEs	Yes	N/A	Seqman pro	13	52	N/A	N/A	N/A	N/A	No	N/A	yes	N/A	yes	N/A	N/A	N/A	Not checked	N/A	N/A	N/A	N/A	N/A	N/A	N/A	N/A	N/A
Detection of potentially human infectious assemblages of Giardia duodenalis in fecal samples from beef and dairy cattle in Scotland	2019	Bartley	Scotland	N/A		N/A	N/A	19	33	4 weeks	rectum	N/A	N/A	N/A	Modified Macherey-Nagel tissue kit	Nested-PCR	Yes	YEs	Yes	N/A	Seqman pro	13	39.4	N/A	N/A	N/A	N/A	No	N/A	no	N/A	yes	N/A	N/A	N/A	Not checked	N/A	N/A	N/A	N/A	N/A	N/A	N/A	N/A	N/A
Detection of potentially human infectious assemblages of Giardia duodenalis in fecal samples from beef and dairy cattle in Scotland	2019	Bartley	Scotland	N/A		N/A	N/A	19	42	>25 weeks	rectum	N/A	N/A	N/A	Modified Macherey-Nagel tissue kit	Nested-PCR	Yes	YEs	Yes	N/A	Seqman pro	18	42.9	N/A	N/A	N/A	N/A	No	N/A	no	N/A	yes	N/A	N/A	N/A	Not checked	N/A	N/A	N/A	N/A	N/A	N/A	N/A	N/A	N/A
Detection of potentially human infectious assemblages of Giardia duodenalis in fecal samples from beef and dairy cattle in Scotland	2019	Bartley	Scotland	N/A		N/A	N/A	19	43	3 weeks	rectum	N/A	N/A	N/A	Modified Macherey-Nagel tissue kit	Nested-PCR	Yes	YEs	Yes	N/A	Seqman pro	6	14	N/A	N/A	N/A	N/A	No	N/A	no	N/A	yes	N/A	N/A	N/A	Not checked	N/A	N/A	N/A	N/A	N/A	N/A	N/A	N/A	N/A
Detection of potentially human infectious assemblages of Giardia duodenalis in fecal samples from beef and dairy cattle in Scotland	2019	Bartley	Scotland	N/A		N/A	N/A	19	50	6 weeks	rectum	N/A	N/A	N/A	Modified Macherey-Nagel tissue kit	Nested-PCR	Yes	YEs	Yes	N/A	Seqman pro	20	40	N/A	N/A	N/A	N/A	No	N/A	no	N/A	yes	N/A	N/A	N/A	Not checked	N/A	N/A	N/A	N/A	N/A	N/A	N/A	N/A	N/A
Detection of potentially human infectious assemblages of Giardia duodenalis in fecal samples from beef and dairy cattle in Scotland	2019	Bartley	Scotland	N/A		N/A	N/A	19	92	7-24 weeks	rectum	N/A	N/A	N/A	Modified Macherey-Nagel tissue kit	Nested-PCR	Yes	YEs	Yes	N/A	Seqman pro	21	22.8	N/A	N/A	N/A	N/A	No	N/A	yes	N/A	yes	N/A	N/A	N/A	Not checked	N/A	N/A	N/A	N/A	N/A	N/A	N/A	N/A	N/A
Endoparasites in calves of beef cattle herds: Management systems dependent and genetic influences	2005	Jäger	Germany	Central germany	N//a	N//a	January-May-October	1	N/A	till 1 week old	N/a	sodium acetate-aceti acid-formaldehyde (SAF)	Flotation	N/A	N/A	N/A	N/A	N/A	N/A	N/A	N/A	N/A	10	N/A	N/A	N/A	N/A	N/A	N/A	N/A	N/A	N/A	N/A	N/A	N/A	Not checked	N/A	N/A	N/A	N/A	N/A	N/A	N/A	N/A	N/A
Endoparasites in calves of beef cattle herds: Management systems dependent and genetic influences	2005	Jäger	Germany	Central germany	N//a	N//a	January-May-October	1	N/A	7 weeks	N/a	sodium acetate-aceti acid-formaldehyde (SAF)	Flotation	N/A	N/A	N/A	N/A	N/A	N/A	N/A	N/A	N/A	15	N/A	N/A	N/A	N/A	N/A	N/A	N/A	N/A	N/A	N/A	N/A	N/A	Not checked	N/A	N/A	N/A	N/A	N/A	N/A	N/A	N/A	N/A
Endoparasites in calves of beef cattle herds: Management systems dependent and genetic influences	2005	Jäger	Germany	Central germany	N//a	N//a	January-May-October	1	N/A	2 weeks	N/a	sodium acetate-aceti acid-formaldehyde (SAF)	Flotation	N/A	N/A	N/A	N/A	N/A	N/A	N/A	N/A	N/A	21	N/A	N/A	N/A	N/A	N/A	N/A	N/A	N/A	N/A	N/A	N/A	N/A	Not checked	N/A	N/A	N/A	N/A	N/A	N/A	N/A	N/A	N/A
Endoparasites in calves of beef cattle herds: Management systems dependent and genetic influences	2005	Jäger	Germany	Central germany	N//a	N//a	January-May-October	1	N/A	6 weeks	N/a	sodium acetate-aceti acid-formaldehyde (SAF)	Flotation	N/A	N/A	N/A	N/A	N/A	N/A	N/A	N/A	N/A	32	N/A	N/A	N/A	N/A	N/A	N/A	N/A	N/A	N/A	N/A	N/A	N/A	Not checked	N/A	N/A	N/A	N/A	N/A	N/A	N/A	N/A	N/A
Endoparasites in calves of beef cattle herds: Management systems dependent and genetic influences	2005	Jäger	Germany	Central germany	N//a	N//a	January-May-October	1	N/A	3 weeks	N/a	sodium acetate-aceti acid-formaldehyde (SAF)	Flotation	N/A	N/A	N/A	N/A	N/A	N/A	N/A	N/A	N/A	35	N/A	N/A	N/A	N/A	N/A	N/A	N/A	N/A	N/A	N/A	N/A	N/A	Not checked	N/A	N/A	N/A	N/A	N/A	N/A	N/A	N/A	N/A
Endoparasites in calves of beef cattle herds: Management systems dependent and genetic influences	2005	Jäger	Germany	Central germany	N//a	N//a	January-May-October	1	N/A	5 weeks	N/a	sodium acetate-aceti acid-formaldehyde (SAF)	Flotation	N/A	N/A	N/A	N/A	N/A	N/A	N/A	N/A	N/A	36	N/A	N/A	N/A	N/A	N/A	N/A	N/A	N/A	N/A	N/A	N/A	N/A	Not checked	N/A	N/A	N/A	N/A	N/A	N/A	N/A	N/A	N/A
Endoparasites in calves of beef cattle herds: Management systems dependent and genetic influences	2005	Jäger	Germany	Central germany	N//a	N//a	January-May-October	1	N/A	4 weeks	N/a	sodium acetate-aceti acid-formaldehyde (SAF)	Flotation	N/A	N/A	N/A	N/A	N/A	N/A	N/A	N/A	N/A	38	N/A	N/A	N/A	N/A	N/A	N/A	N/A	N/A	N/A	N/A	N/A	N/A	Not checked	N/A	N/A	N/A	N/A	N/A	N/A	N/A	N/A	N/A
Enteropathogens and risk factors for diarrhea in Norwegian dairy calves	2009	Gulliksen	Norway	N/a	2004	2007	Autumn, Spring	135	68	till 12 months old	N/A	N/A	IFM	N/A	N/A	N/A	N/A	N/A	N/A	N/A	N/A	2	2.9	2	10	N/A	N/A	N/A	N/A	N/A	N/A	N/A	N/A	N/A	N/A	yes, diarrhea	N/A	N/a	N/A	yes	N/a	N/a	N/a	N/A	N/A
Enteropathogens and risk factors for diarrhea in Norwegian dairy calves	2009	Gulliksen	Norway	N/a	2004	2007	Autumn, Spring	135	68	till 12 months old	N/A	N/A	IFM	N/A	N/A	N/A	N/A	N/A	N/A	N/A	N/A	2	2.9	10	N/A	N/A	N/A	N/A	N/A	N/A	N/A	N/A	N/A	N/A	N/A	yes, diarrhea	N/A	N/a	N/A	yes	N/a	N/a	N/a	N/A	N/A
Enteropathogens and risk factors for diarrhea in Norwegian dairy calves	2009	Gulliksen	Norway	N/a	2004	2007	Autumn, Spring	135	68	till 12 months old	N/A	N/A	IFM	N/A	N/A	N/A	N/A	N/A	N/A	N/A	N/A	39	57.4	1	1	N/A	N/A	N/A	N/A	N/A	N/A	N/A	N/A	N/A	N/A	yes, diarrhea	N/A	N/a	N/A	yes	N/a	N/a	N/a	N/A	N/A
Enteropathogens and risk factors for diarrhea in Norwegian dairy calves	2009	Gulliksen	Norway	N/a	2004	2007	Autumn, Spring	135	691	till 12 months old	N/A	N/A	IFM	N/A	N/A	N/A	N/A	N/A	N/A	N/A	N/A	26	3.8	2	10	N/A	N/A	N/A	N/A	N/A	N/A	N/A	N/A	N/A	N/A	yes, diarrhea	N/A	N/a	N/A	no	N/a	N/a	N/a	N/A	N/A
Enteropathogens and risk factors for diarrhea in Norwegian dairy calves	2009	Gulliksen	Norway	N/a	2004	2007	Autumn, Spring	135	691	till 12 months old	N/A	N/A	IFM	N/A	N/A	N/A	N/A	N/A	N/A	N/A	N/A	35	5	10	N/A	N/A	N/A	N/A	N/A	N/A	N/A	N/A	N/A	N/A	N/A	yes, diarrhea	N/A	N/a	N/A	no	N/a	N/a	N/a	N/A	N/A
Enteropathogens and risk factors for diarrhea in Norwegian dairy calves	2009	Gulliksen	Norway	N/a	2004	2007	Autumn, Spring	135	691	till 12 months old	N/A	N/A	IFM	N/A	N/A	N/A	N/A	N/A	N/A	N/A	N/A	404	58.5	1	1	N/A	N/A	N/A	N/A	N/A	N/A	N/A	N/A	N/A	N/A	yes, diarrhea	N/A	N/a	N/A	no	N/a	N/a	N/a	N/A	N/A
Epidemiology of Cryptosporidium spp. and Giardia duodenalis on a dairy farm	2001	Huetink	The Netherlands	Western part	1999	2000	Oct-June	1	22	4-5 months	per rectum	N/A	IFM	Crypto/Giardia FITC, Cellabs	PCR fingerprinting	Nested-PCR	No	No	Yes	N/a	N/A	12	54.5	N/A	N/A	N/A		Yes	N/A	N/A	N/A	N/A	N/A	N/A	N/A	yes, diarrhea	N/A	N/A	N/A	Yes	6.5	N/A	N/A	N/A	N/A
Epidemiology of Cryptosporidium spp. and Giardia duodenalis on a dairy farm	2001	Huetink	The Netherlands	Western part	2000	2000	April	1	9	Calves	per rectum	N/A	IFM	Crypto/Giardia FITC, Cellabs	PCR fingerprinting	Nested-PCR	No	No	Yes	N/a	N/A	0	0	N/A	N/A	N/A	4	N/A	N/A	N/A	N/A	N/A	N/A	N/A	N/A	yes, diarrhea	N/A	N/A	N/A	N/A	N/A	N/A	N/A	N/A	N/A
Epidemiology of Cryptosporidium spp. and Giardia duodenalis on a dairy farm	2001	Huetink	The Netherlands	Western part	1999	1999	October	1	15	Calves	per rectum	N/A	IFM	Crypto/Giardia FITC, Cellabs	PCR fingerprinting	Nested-PCR	No	No	Yes	N/a	N/A	0	0	N/A	N/A	N/A	11	N/A	N/A	N/A	N/A	N/A	N/A	N/A	N/A	yes, diarrhea	N/A	N/A	N/A	N/A	N/A	N/A	N/A	N/A	N/A
Epidemiology of Cryptosporidium spp. and Giardia duodenalis on a dairy farm	2001	Huetink	The Netherlands	Western part	1999	1999	December	1	16	Calves	per rectum	N/A	IFM	Crypto/Giardia FITC, Cellabs	PCR fingerprinting	Nested-PCR	No	No	Yes	N/a	N/A	2	12.5	N/A	N/A	N/A	14.3	N/A	N/A	N/A	N/A	N/A	N/A	N/A	N/A	yes, diarrhea	N/A	N/A	N/A	N/A	N/A	N/A	N/A	N/A	N/A
Epidemiology of Cryptosporidium spp. and Giardia duodenalis on a dairy farm	2001	Huetink	The Netherlands	Western part	2000	2000	March	1	21	Calves	per rectum	N/A	IFM	Crypto/Giardia FITC, Cellabs	PCR fingerprinting	Nested-PCR	No	No	Yes	N/a	N/A	0	0	N/A	N/A	N/A		N/A	N/A	N/A	N/A	N/A	N/A	N/A	N/A	yes, diarrhea	N/A	N/A	N/A	N/A	N/A	N/A	N/A	N/A	N/A
Epidemiology of Cryptosporidium spp. and Giardia duodenalis on a dairy farm	2001	Huetink	The Netherlands	Western part	2000	2000	January	1	22	Calves	per rectum	N/A	IFM	Crypto/Giardia FITC, Cellabs	PCR fingerprinting	Nested-PCR	No	No	Yes	N/a	N/A	4	18.2	N/A	N/A	N/A		N/A	N/A	N/A	N/A	N/A	N/A	N/A	N/A	yes, diarrhea	N/A	N/A	N/A	N/A	N/A	N/A	N/A	N/A	N/A
Epidemiology of Cryptosporidium spp. and Giardia duodenalis on a dairy farm	2001	Huetink	The Netherlands	Western part	2000	2000	February	1	22	Calves	per rectum	N/A	IFM	Crypto/Giardia FITC, Cellabs	PCR fingerprinting	Nested-PCR	No	No	Yes	N/a	N/A	6	27.3	N/A	N/A	N/A	15.1	N/A	N/A	N/A	N/A	N/A	N/A	N/A	N/A	yes, diarrhea	N/A	N/A	N/A	N/A	N/A	N/A	N/A	N/A	N/A
Epidemiology of Cryptosporidium spp. and Giardia duodenalis on a dairy farm	2001	Huetink	The Netherlands	Western part	1999	1999	November	1	25	Calves	per rectum	N/A	IFM	Crypto/Giardia FITC, Cellabs	PCR fingerprinting	Nested-PCR	No	No	Yes	N/a	N/A	0	0	N/A	N/A	N/A		N/A	N/A	N/A	N/A	N/A	N/A	N/A	N/A	yes, diarrhea	N/A	N/A	N/A	N/A	N/A	N/A	N/A	N/A	N/A
Epidemiology of Cryptosporidium spp. and Giardia duodenalis on a dairy farm	2001	Huetink	The Netherlands	Western part	2000	2000	May	1	26	Calves	per rectum	N/A	IFM	Crypto/Giardia FITC, Cellabs	PCR fingerprinting	Nested-PCR	No	No	Yes	N/a	N/A	0	0	N/A	N/A	N/A		N/A	N/A	N/A	N/A	N/A	N/A	N/A	N/A	yes, diarrhea	N/A	N/A	N/A	N/A	N/A	N/A	N/A	N/A	N/A
Epidemiology of Cryptosporidium spp. and Giardia duodenalis on a dairy farm	2001	Huetink	The Netherlands	Western part	2000	2000	June	1	27	Calves	per rectum	N/A	IFM	Crypto/Giardia FITC, Cellabs	PCR fingerprinting	Nested-PCR	No	No	Yes	N/a	N/A	0	0	N/A	N/A	N/A	0.8	N/A	N/A	N/A	N/A	N/A	N/A	N/A	N/A	yes, diarrhea	N/A	N/A	N/A	N/A	N/A	N/A	N/A	N/A	N/A
Identification and molecular characterization of Cryptosporidium and Giardia in children and cattle populations from the province of Álava, North of Spain	2011	Cardona	Spain	Álava	2008	2009	Autum-Spring	23	227	N/A	rectum	N/A	ELISA, ICT	CpAG-ELISA (Giardia lamblia antigen-Elisa)	N/A	PCR	No	Yes	No	N/A			1.4	N/A	N/A	42.9	N/A	Not obrained	Not obrained	Not obrained	Not obrained	Not obrained	Not obrained	N/A	N/A	Not checked	N/A	N/A	N/A	N/A	N/A	N/A	N/A	N/A	N/A
Mixed Giardia duodenalis assemblage A and E infections in calves	2008	Geurden	Belgium	East-Flanders	2001	2005	September-August	50	333	Total beef cattle	N/a	N/A	IFM	Merifluor Cryptosporidium/Giardia kit	QIAamp DNA Stool mini kit	N/A	N/A	N/A	N/A	N/A	N/A	N/A	45			64		yes	7	N/A	N/A	yes	37	N/A	N/A	Not checked	N/A	N/A	N/A	N/A	N/A	N/A	N/A	N/A	N/A
Mixed Giardia duodenalis assemblage A and E infections in calves	2008	Geurden	Belgium	East-Flanders	2001	2005	September-August	100	499	total dairy cattle	N/a	N/A	IFM	Merifluor Cryptosporidium/Giardia kit	QIAamp DNA Stool mini kit	Nested-PCR	yes	yes	N/a	N/A	N/A	N/A	22			48		yes	29	N/A	N/A	yes	20	N/A	N/A	Not checked	N/A	N/A	N/A	N/A	N/A	N/A	N/A	N/A	N/A
Mixed Giardia duodenalis assemblage A and E infections in calves	2008	Geurden	Belgium	East-Flanders	2001	2005	September-August	100		<4 weeks	N/a	N/A	IFM	Merifluor Cryptosporidium/Giardia kit	QIAamp DNA Stool mini kit	N/A	N/A	N/A	N/A	N/A	N/A	N/A	9							N/A	N/A			N/A	N/A	Not checked	N/A	N/A	N/A	N/A	N/A	N/A	N/A	N/A	N/A
Mixed Giardia duodenalis assemblage A and E infections in calves	2008	Geurden	Belgium	East-Flanders	2001	2005	September-August	100		4-10 weeks	N/a	N/A	IFM	Merifluor Cryptosporidium/Giardia kit	QIAamp DNA Stool mini kit	N/A	N/A	N/A	N/A	N/A	N/A	N/A	34							N/A	N/A			N/A	N/A	Not checked	N/A	N/A	N/A	N/A	N/A	N/A	N/A	N/A	N/A
Mixed Giardia duodenalis assemblage A and E infections in calves	2008	Geurden	Belgium	East-Flanders	2001	2005	September-August	100		4-10 weeks	N/a	N/A	IFM	Merifluor Cryptosporidium/Giardia kit	QIAamp DNA Stool mini kit	Nested-PCR	yes	yes	N/a	N/A	N/A	N/A	41							N/A	N/A			N/A	N/A	Not checked	N/A	N/A	N/A	N/A	N/A	N/A	N/A	N/A	N/A
Mixed Giardia duodenalis assemblage A and E infections in calves	2008	Geurden	Belgium	East-Flanders	2001	2005	September-August	100		<4 weeks	N/a	N/A	IFM	Merifluor Cryptosporidium/Giardia kit	QIAamp DNA Stool mini kit	Nested-PCR	yes	yes	N/a	N/A	N/A	N/A	55							N/A	N/A			N/A	N/A	Not checked	N/A	N/A	N/A	N/A	N/A	N/A	N/A	N/A	N/A
Molecular and phylogenetic characterization of Cryptosporidium and Giardia from pigs and cattle in Denmark	2007	Langkjaer	Denmark	N/A	2003	2004	august-July	50	1150	<1 month	Rectum	Sample purification	IFM	N/A	QIAamp DNA Stool mini kit	Semi-nested PCR	N/A	N/A	Yes	18S rDNA locust	ClustalX		34	N/A	N/A	N/A	N/A	Yes	6	No	No	yes	72	No	N/a	Not checked	N/a	N/a	N/a	N/a	N/a	N/a	N/a	N/A	N/A
Molecular and phylogenetic characterization of Cryptosporidium and Giardia from pigs and cattle in Denmark	2007	Langkjaer	Denmark	N/A	2003	2004	august-July	50	1150	3-12 months	Rectum	Sample purification	IFM	N/A	QIAamp DNA Stool mini kit	Semi-nested PCR	N/A	N/A	Yes	18S rDNA locust	ClustalX		44	N/A	N/A	N/A	N/A	Yes	6	No	No	Yes	72	No	N/a	Not checked	N/a	N/a	N/a	N/a	N/a	N/a	N/a	N/A	N/A
Molecular and phylogenetic characterization of Cryptosporidium and Giardia from pigs and cattle in Denmark	2007	Langkjaer	Denmark	N/A	2003	2004	august-July	50	1150	Lactating cows	Rectum	Sample purification	IFM	N/A	QIAamp DNA Stool mini kit	Semi-nested PCR	N/A	N/A	Yes	18S rDNA locust	ClustalX		20	N/A	N/A	N/A	N/A	No		No	No	Yes	100	No	N/a	Not checked	N/a	N/a	N/a	N/a	N/a	N/a	N/a	N/A	N/A
Molecular identification of zoonotic and livestock-specific Giardia-species in faecal samples of calves in Southern Germany	2013	Gillhuber	Germany	Southern	2011	2013	June-January	N/A	N/A	3-130 days	N/A	N/A	Merthiolate iodine formaldehyde cocentration	N/A	Maxwell 16 Tissue DNA Purification Kit, Promega, USA	Nested-PCR	Yes	no	YES	N/A	Sequencher 4.8	101	N/A	N/A	N/A	N/A	N/A	yes	7.3	no	N/a	yes	91.8	A and E	0.9	Not checked	N/A	N/A	N/A	N/A	N/A	N/A	N/A	N/A	N/A
Occurrence and Diversity of Giardia duodenalis Assemblages in Livestock in the UK	2014	Minetti	United Kingdonm	N/A	2007	2008	September-June	N/A	283	Total	Rectum	N/A	N/A	N/A	QIAmp DNA mini Kit	PCR	N/A	N/A	N/A	292-bp fragment of SSU rRNA	ClustalW	93	32.9	N/A	N/A	N/A	N/A	Yes	25.4	No	N/A	Yes	52.4	Yes	22.2	yes, age, diarrhea	Yes	Pre-weaned	0.002	No		N/A	N/A	N/A	N/A
Occurrence and Diversity of Giardia duodenalis Assemblages in Livestock in the UK	2014	Minetti	United Kingdonm	N/A	2007	2008	September-June	N/A	22	neonatal	Rectum	N/A	N/A	N/A	QIAmp DNA mini Kit	PCR	N/A	N/A	N/A	292-bp fragment of SSU rRNA	ClustalW	7	31.8	N/A	N/A	N/A	N/A	Yes	N/A	N/A	N/A	Yes	N/A	Yes	N/A	yes, age, diarrhea	No		0.404			N/A	N/A	N/A	N/A
Occurrence and Diversity of Giardia duodenalis Assemblages in Livestock in the UK	2014	Minetti	United Kingdonm	N/A	2007	2008	September-June	N/A	23	post-weaned	Rectum	N/A	N/A	N/A	QIAmp DNA mini Kit	PCR	N/A	N/A	N/A	292-bp fragment of SSU rRNA	ClustalW	6	26.1	N/A	N/A	N/A	N/A	Yes	N/A	N/A	N/A	Yes	N/A	Yes	N/A	yes, age, diarrhea	No		0.754			N/A	N/A	N/A	N/A
Occurrence and Diversity of Giardia duodenalis Assemblages in Livestock in the UK	2014	Minetti	United Kingdonm	N/A	2007	2008	September-June	N/A	78	pre-weaned	Rectum	N/A	N/A	N/A	QIAmp DNA mini Kit	PCR	N/A	N/A	N/A	292-bp fragment of SSU rRNA	ClustalW	34	43.6	N/A	N/A	N/A	N/A	Yes	N/A	N/A	N/A	Yes	N/A	Yes	N/A	yes, age, diarrhea	Yes		0.002			N/A	N/A	N/A	N/A
Occurrence and Diversity of Giardia duodenalis Assemblages in Livestock in the UK	2014	Minetti	United Kingdonm	N/A	2007	2008	September-June	N/A	139	adult	Rectum	N/A	N/A	N/A	QIAmp DNA mini Kit	PCR	N/A	N/A	N/A	292-bp fragment of SSU rRNA	ClustalW	32	23	N/A	N/A	N/A	N/A	Yes	N/A	N/A	N/A	Yes	N/A	Yes	N/A	yes, age, diarrhea	No					N/A	N/A	N/A	N/A
Occurrence of Cryptosporidium parvum and Giardia duodenalis in healthy adult domestic ruminants	2007	Castro-Hermida	Spain	Galicia	N/A	N/A	N/A	60	379	3-13 years	rectum	N/A	IFM	Aqua-Glo G/C direct FL, Waterborne, USA	QIAmp DNA mini Kit	PCR	Yes	No	Yes	N/a	ProSeq, Chromas pro	101	26.6	15	3042	96.6	N/A	No	N/A	No	N/A	Yes	N/A	No	N/A	Not checked	N/A	N/A	N/A	N/A	N/A	N/A	N/A	N/A	N/A
Prevalence of Cryptosporidium and Giardia infections in cattle in Aragón (northeastern Spain)	1996	Quílez	Spain	Aragón	1990	1993	December, August	16	78	<1.5 m	Rectum	Formalin-ethyl acetate sedimentation	Iodine staining	N/A	N/A	N/A	N/A	N/A	N/A	N/A	N/A	11	14.1	N/A	N/A	N/A	N/A	N/A	N/A	N/A	N/A	N/A	N/A	N/A	N/A	yes, age, diarrhea	Yes		N/A	no	0.45	N/A	N/A	N/A	N/A
Prevalence of Cryptosporidium and Giardia infections in cattle in Aragón (northeastern Spain)	1996	Quílez	Spain	Aragón	1990	1993	December, August	16	121	1.5-4m	Rectum	Formalin-ethyl acetate sedimentation	Iodine staining	N/A	N/A	N/A	N/A	N/A	N/A	N/A	N/A	46	38	N/A	N/A	N/A	N/A	N/A	N/A	N/A	N/A	N/A	N/A	N/A	N/A	yes, age, diarrhea	yes		N/A	no	0.109	N/A	N/A	N/A	N/A
Prevalence of Cryptosporidium and Giardia infections in cattle in Aragón (northeastern Spain)	1996	Quílez	Spain	Aragón	1990	1993	December, August	16	130	4-24m	Rectum	Formalin-ethyl acetate sedimentation	Iodine staining	N/A	N/A	N/A	N/A	N/A	N/A	N/A	N/A	3	2.3	N/A	N/A	N/A	N/A	N/A	N/A	N/A	N/A	N/A	N/A	N/A	N/A	yes, age, diarrhea	no		N/A			N/A	N/A	N/A	N/A
Prevalence of Cryptosporidium and Giardia infections in cattle in Aragón (northeastern Spain)	1996	Quílez	Spain	Aragón	1990	1993	December, August	16	225	>24m	Rectum	Formalin-ethyl acetate sedimentation	Iodine staining	N/A	N/A	N/A	N/A	N/A	N/A	N/A	N/A	5	2.2	N/A	N/A	N/A	N/A	N/A	N/A	N/A	N/A	N/A	N/A	N/A	N/A	yes, age, diarrhea	no		N/A			N/A	N/A	N/A	N/A
Prevalence of Cryptosporidium and Giardia infections in cattle in Aragón (northeastern Spain)	1996	Quílez	Spain	Aragón	1990	1993	December, August	16	554	Total	Rectum	Formalin-ethyl acetate sedimentation	Iodine staining	N/A	N/A	N/A	N/A	N/A	N/A	N/A	N/A	65	11.7	N/A	N/A	53.3	N/A	N/A	N/A	N/A	N/A	N/A	N/A	N/A	N/A	yes, age, diarrhea	Yes		N/A	No		N/A	N/A	N/A	N/A
Prevalence of Giardia and Cryptosporidium in dairy calves in three areas of Norway	2006	Hamnes	Norway	Rogaland, Nord-Trøndelag, Oppland	2001	2003	Summer, fall, winter	136	155	123-153	rectum	Sacruse flotation	IFM	A 100FR Fl/CY3, Waterborne, USA	N/A	N/A	N/A	N/A	N/A	N/a	N/A	N/A	43.2	N/A	N/A	N/A	N/A	N/A	N/A	N/A	N/A	N/A	N/A	N/A	N/A	yes, age	Yes	N/A	N/A	N/A	N/A	N/A	N/A	N/A	N/A
Prevalence of Giardia and Cryptosporidium in dairy calves in three areas of Norway	2006	Hamnes	Norway	Rogaland, Nord-Trøndelag, Oppland	2001	2003	Summer, fall, winter	136	184	154-183	rectum	Sacruse flotation	IFM	A 100FR Fl/CY3, Waterborne, USA	N/A	N/A	N/A	N/A	N/A	N/a	N/A	N/A	47.8	N/A	N/A	N/A	N/A	N/A	N/A	N/A	N/A	N/A	N/A	N/A	N/A	yes, age	N/A	N/A	N/A	N/A	N/A	N/A	N/A	N/A	N/A
Prevalence of Giardia and Cryptosporidium in dairy calves in three areas of Norway	2006	Hamnes	Norway	Rogaland, Nord-Trøndelag, Oppland	2001	2003	Summer, fall, winter	136	200	3-31 days	rectum	Sacruse flotation	IFM	A 100FR Fl/CY3, Waterborne, USA	N/A	N/A	N/A	N/A	N/A	N/a	N/A	N/A	30.5	N/A	N/A	N/A	N/A	N/A	N/A	N/A	N/A	N/A	N/A	N/A	N/A	yes, age	Yes	N/A	N/A	N/A	N/A	N/A	N/A	N/A	N/A
Prevalence of Giardia and Cryptosporidium in dairy calves in three areas of Norway	2006	Hamnes	Norway	Rogaland, Nord-Trøndelag, Oppland	2001	2003	Summer, fall, winter	136	231	93-112	rectum	Sacruse flotation	IFM	A 100FR Fl/CY3, Waterborne, USA	N/A	N/A	N/A	N/A	N/A	N/a	N/A	N/A	55.9	N/A	N/A	N/A	N/A	N/A	N/A	N/A	N/A	N/A	N/A	N/A	N/A	yes, age	N/A	N/A	N/A	N/A	N/A	N/A	N/A	N/A	N/A
Prevalence of Giardia and Cryptosporidium in dairy calves in three areas of Norway	2006	Hamnes	Norway	Rogaland, Nord-Trøndelag, Oppland	2001	2003	Summer, fall, winter	136	234	32-61 days	rectum	Sacruse flotation	IFM	A 100FR Fl/CY3, Waterborne, USA	N/A	N/A	N/A	N/A	N/A	N/a	N/A	N/A	54.3	N/A	N/A	N/A	N/A	N/A	N/A	N/A	N/A	N/A	N/A	N/A	N/A	yes, age	N/A	N/A	N/A	N/A	N/A	N/A	N/A	N/A	N/A
Prevalence of Giardia and Cryptosporidium in dairy calves in three areas of Norway	2006	Hamnes	Norway	Rogaland, Nord-Trøndelag, Oppland	2001	2003	Summer, fall, winter	136	289	62-92 days	rectum	Sacruse flotation	IFM	A 100FR Fl/CY3, Waterborne, USA	N/A	N/A	N/A	N/A	N/A	N/a	N/A	N/A	57.8	N/A	N/A	N/A	N/A	N/A	N/A	N/A	N/A	N/A	N/A	N/A	N/A	yes, age	N/A	N/A	N/A	N/A	N/A	N/A	N/A	N/A	N/A
Prevalence of Giardia and Cryptosporidium in dairy calves in three areas of Norway	2006	Hamnes	Norway	Rogaland	2001	2002	Summer, fall, winter	32	450	3-183 days	rectum	Sacruse flotation	IFM	A 100FR Fl/CY3, Waterborne, USA	N/A	N/A	N/A	N/A	N/A	N/a	N/A	N/A	46.7	N/A	N/A	96.9	N/A	N/A	N/A	N/A	N/A	N/A	N/A	N/A	N/A	yes, age	N/A	N/A	N/A	N/A	N/A	N/A	N/A	N/A	N/A
Prevalence of Giardia and Cryptosporidium in dairy calves in three areas of Norway	2006	Hamnes	Norway	Oppland	2001	2002	Summer, fall, winter	57	461	3-183 days	rectum	Sacruse flotation	IFM	A 100FR Fl/CY3, Waterborne, USA	N/A	N/A	N/A	N/A	N/A	N/a	N/A	N/A	44.5	N/A	N/A	91.2	N/A	N/A	N/A	N/A	N/A	N/A	N/A	N/A	N/A	yes, age	N/A	N/A	N/A	N/A	N/A	N/A	N/A	N/A	N/A
Prevalence of Giardia and Cryptosporidium in dairy calves in three areas of Norway	2006	Hamnes	Norway	Nord-Trøndelag	2002	2003	December, March	47	475	3-183 days	rectum	Sacruse flotation	IFM	A 100FR Fl/CY3, Waterborne, USA	N/A	N/A	N/A	N/A	N/A	N/a	N/A	N/A	55.6	N/A	N/A	93.6	N/A	N/A	N/A	N/A	N/A	N/A	N/A	N/A	N/A	yes, age	N/A	N/A	N/A	N/A	N/A	N/A	N/A	N/A	N/A
																							22.9026
																							16.3806
